# Supplementary material for: In Vivo Small Molecule Delivery to the Optic Nerve in a Rodent Model
Source: PubMed Central journal article supplement (PMC5849600; doi:10.1038/s41598-018-22737-4), 2018-03-13
Supplement: 41598_2018_22737_MOESM1_ESM.pdf [file 41598_2018_22737_MOESM1_ESM.pdf]

***In Vivo* Small Molecule Delivery to the Optic Nerve in a Rodent Model**

Shandiz Tehrani\*, R. Katherine Delf, William O. Cepurna, Lauren Davis, Elaine C. Johnson,  
John C. Morrison

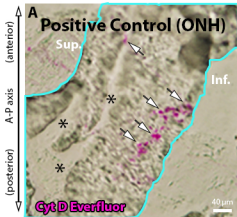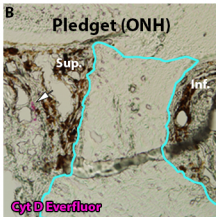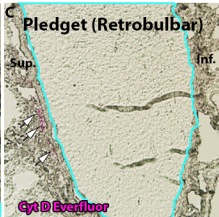

## SUPPLEMENTARY INFORMATION LEGENDS

**Supplementary Figure S1. Fluorescent-tagged cytochalasin D does not significantly penetrate the optic nerve tissue after surgical delivery to the optic nerve.** (A) Fluorescent-tagged cytochalasin D (Cyt D Everfluor) visualized within the optic nerve head (ONH) tissue after direct injection into the optic nerve as a positive control for Cyt D Everfluor detection (i.e. without pledget use). Note the multiple areas of Cyt D Everfluor within the ONH tissue (arrows). The tract from the 31g needle injection into the optic nerve tissue is denoted by the asterisks (\*). (B) No significant Cyt D Everfluor is observed within the ONH tissue after pledget delivery of Cyt D Everfluor. Note the Cyt D Everfluor signal outside of the ONH tissue (arrow). The perineural brown pigment is typical in pigmented Brown Norway rat tissue. (C) No significant Cyt D Everfluor is observed within the retrobulbar optic nerve tissue after pledget delivery of Cyt D Fluor. Note the Cyt D Everfluor signal outside of the ONH tissue (arrow). Cyt D = cytochalasin D; Inf. = inferior; ONH = optic nerve head; Sup. = superior. Optic nerve tissue is outlined in turquoise.
